# Supplementary material for: Hydrophilic Self-Replenishing Coatings with Long-Term Water Stability for Anti-Fouling Applications
Source: Preprints.org preprint supplement (doi:10.20944/preprints201803.0114.v1), 2018-03-15
Supplement: Supplementary file 1 [file supplementary]

# Hydrophilic self-replenishing coatings for marine anti-fouling applications

*I. Jiménez-Pardo, L.G.J. van der Ven, R.A.T.M. van Bentem, G. de With\*, A.C.C. Esteves\**

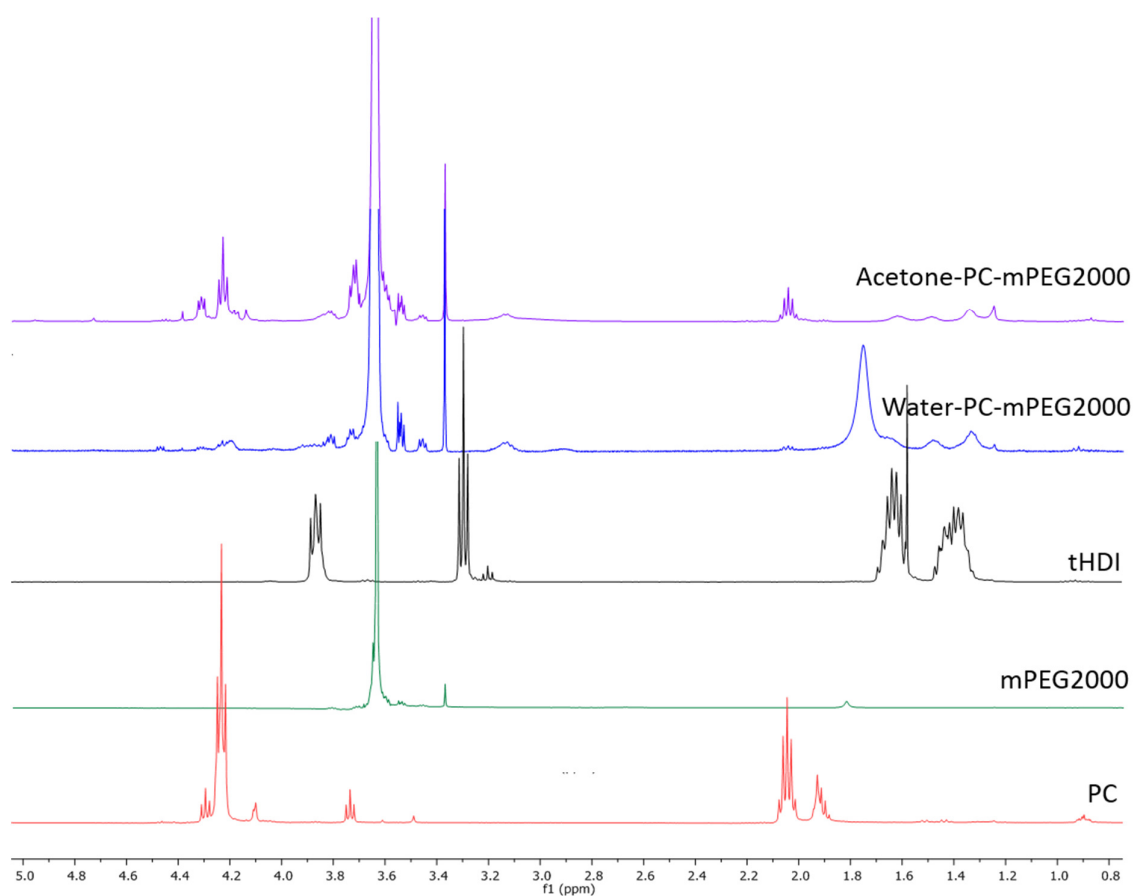

**Figure S1.** <sup>1</sup>H-NMR spectra (400 MHz, CDCl<sub>3</sub>) for PC-mPEG2000 acetone and water extracts, and pure coatings components, tHDI, mPEG2000 and PC polymer.

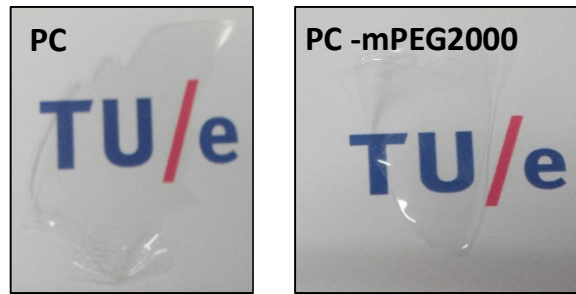

|                    | Weight loss (%) |
|--------------------|-----------------|
| <b>PC-Ref</b>      | 1.2 ± 0.5       |
| <b>PC-mPEG550</b>  | 2.1 ± 1.3       |
| <b>PC-mPEG1000</b> | 2.3 ± 1.1       |
| <b>PC-mPEG2000</b> | 3.1 ± 1.8       |

**Figure S2.** Coatings appearance and weight loss (%) after 1 year water immersion. PC and PC-mPEG2000 images after 1 year immersion in water. Transparent and colorless free standing coatings placed on top of a logo.

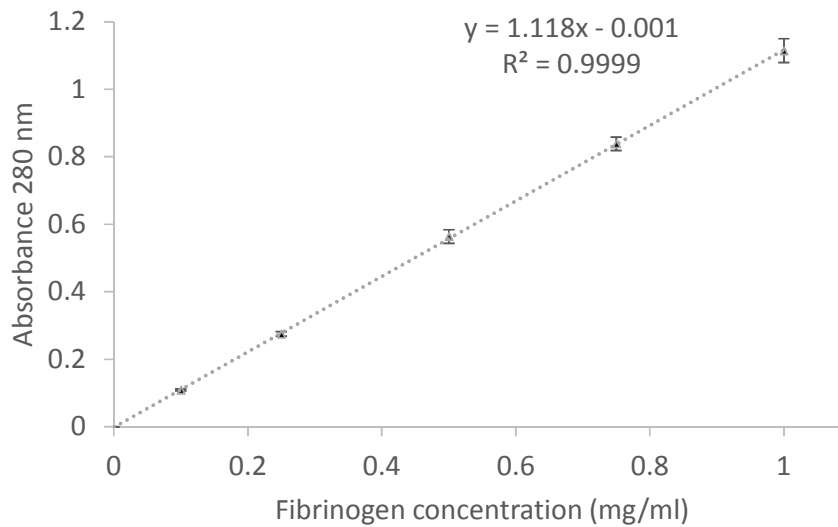

**Figure S3.** Fibrinogen calibration curve built from PBS protein solutions of 0.1 to 1 mg·ml<sup>-1</sup> and having a good linearity in the measured concentration range with R<sup>2</sup> of 0.9999.

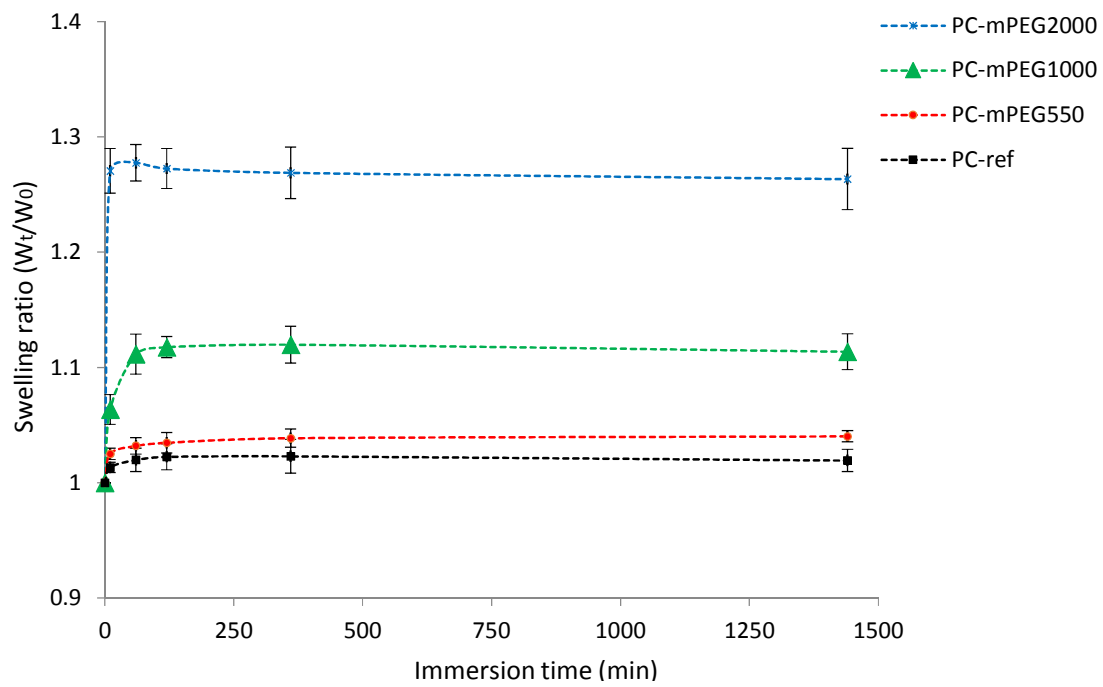

**Figure S4.** Swelling ratio profiles (weight of water swollen coating at different immersion times ( $W_t$ ) divided by the initial dried coating ( $W_0$ )) for coatings immersed in water for 24 hours.
